# Supplementary material for: Plant resistance against the parasitic nematode Heterodera schachtii is mediated by MPK3 and MPK6 kinases, which are controlled by the MAPK phosphatase AP2C1 in Arabidopsis
Source: PubMed Central journal article supplement (PMC4682428; doi:10.1093/jxb/erv440), 2015-10-05
Supplement: supp_erv440_jexbot150797_file001.pdf [file supp_erv440_jexbot150797_file001.pdf]

**Plant resistance against the parasitic nematode *Heterodera schachtii*  
is mediated by MPK3 and MPK6 kinases,  
which are controlled by the MAPK phosphatase AP2C1 in Arabidopsis**

Ekaterina Sidonskaya, Alois Schweighofer, Volodymyr Shubshynskyy, Nina Kammerhofer,  
Julia Hofmann, Krzysztof Wieczorek, Irute Meskiene

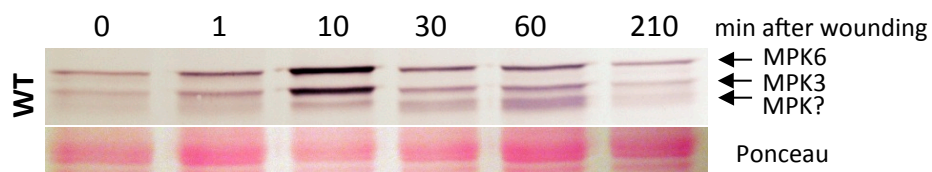

**Supplementary Figure S1. Analysis of MAPKs activation in roots during mechanical wounding.**

Phosphorylation of MPK6 and MPK3 was detected by immunoblotting with anti-phospho ERK1/2 antibody. Ponceau-stained membranes present protein loading.

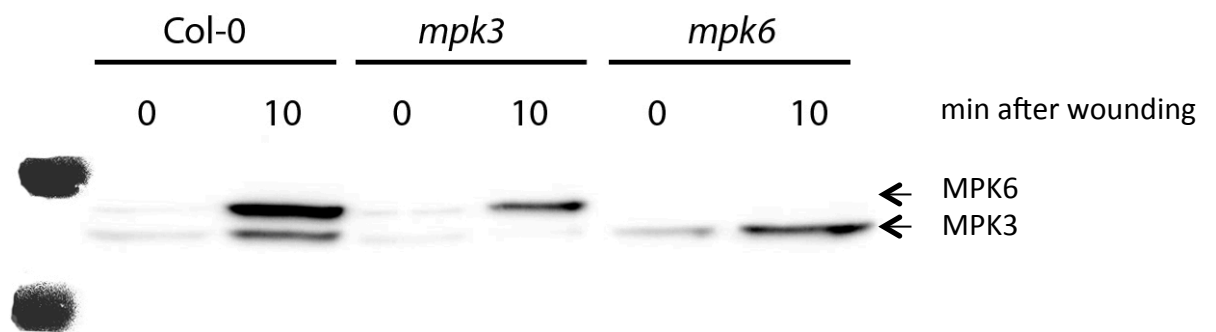

**Supplementary Figure S2.** Analysis of MPK3 and MPK6 activation in mechanically wounded roots of Col-0, *mpk3* and *mpk6* mutant lines. Phosphorylation of MPKs was detected by immunoblotting with anti-phospho ERK1/2 antibody.

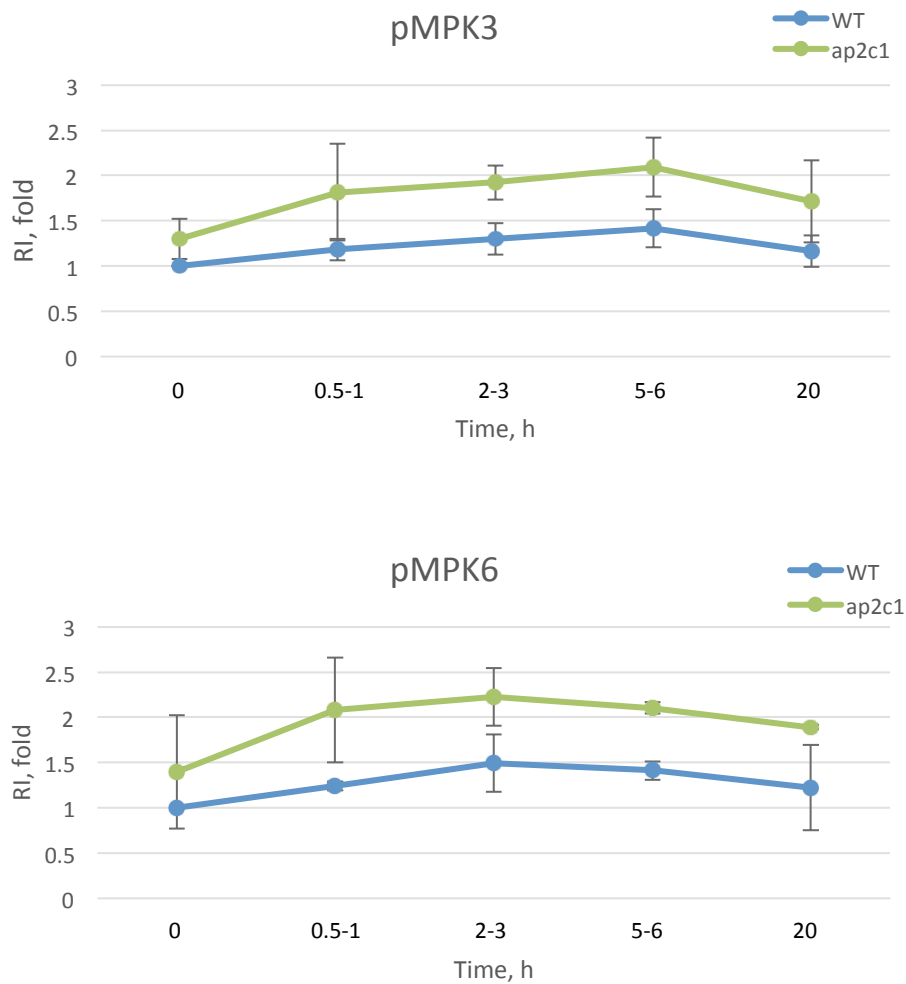

**Supplementary Figure S3.** Quantification of MPK3 and MPK6 activation during early stages of *H. schachtii* infection. Values shown are means +/- standard deviation from three independent repetitions. The quantification was performed with ImageJ, RI – relative intensity.
